# Supplementary material for: ReacNetGenerator: an automatic reaction network generator for reactive molecular dynamics simulations
Source: Royal Society of Chemistry journal article supplement (doi:10.1039/c9cp05091d), 2019-11-25
Supplement: c9cp05091d1.pdf [file c9cp05091d1.pdf]

## Supporting Information

### ReacNetGenerator: An Automatic Reaction Network Generator for Reactive Molecular Dynamic Simulations

Jinze Zeng<sup>1†</sup>, Liqun Cao<sup>1†</sup>, Chih-Hao Chin<sup>1,2\*</sup>, Haisheng Ren<sup>3\*</sup>, John Z.H. Zhang<sup>1,2,4</sup> and Tong Zhu<sup>1,2\*</sup>

<sup>1</sup>Shanghai Engineering Research Center of Molecular Therapeutics & New Drug Development, School of Chemistry and Molecular Engineering, East China Normal University, Shanghai, 200062, China

<sup>2</sup>NYU-ECNU Center for Computational Chemistry at NYU Shanghai, Shanghai, 200062, China

<sup>3</sup>School of Chemical Engineering, Sichuan University, Chengdu 610065, China

<sup>4</sup>Department of Chemistry, New York University, New York 10003, United States

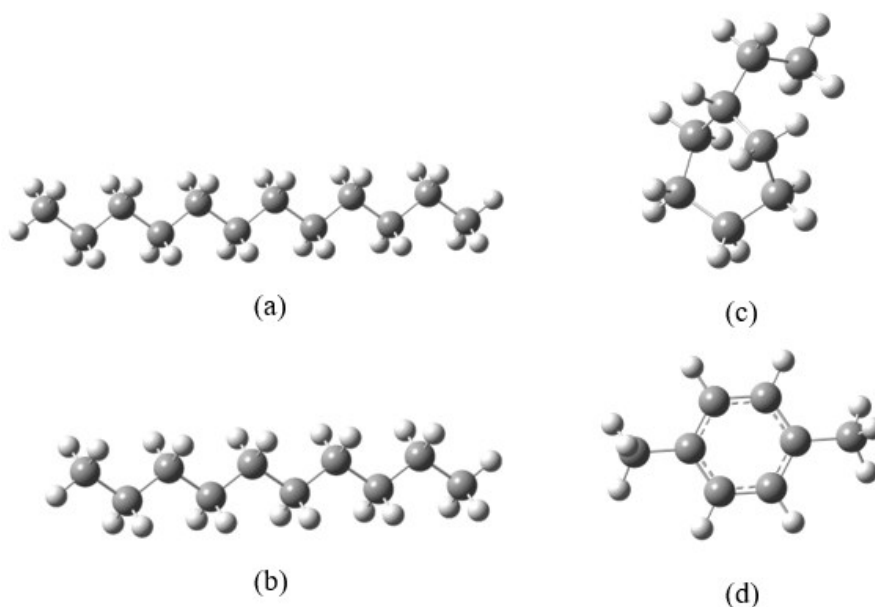

**Figure S1.** The 4-component RP-3 contains (a), 42% *n*-dodecane ( $n\text{-C}_{12}\text{H}_{26}$ ), (b), 40% *n*-decane ( $n\text{-C}_{10}\text{H}_{22}$ ), (c), 13% ethylcyclohexane ( $\text{C}_8\text{H}_{16}$ ), and (d), 5 % *p*-xylene ( $\text{C}_8\text{H}_{10}$ ).

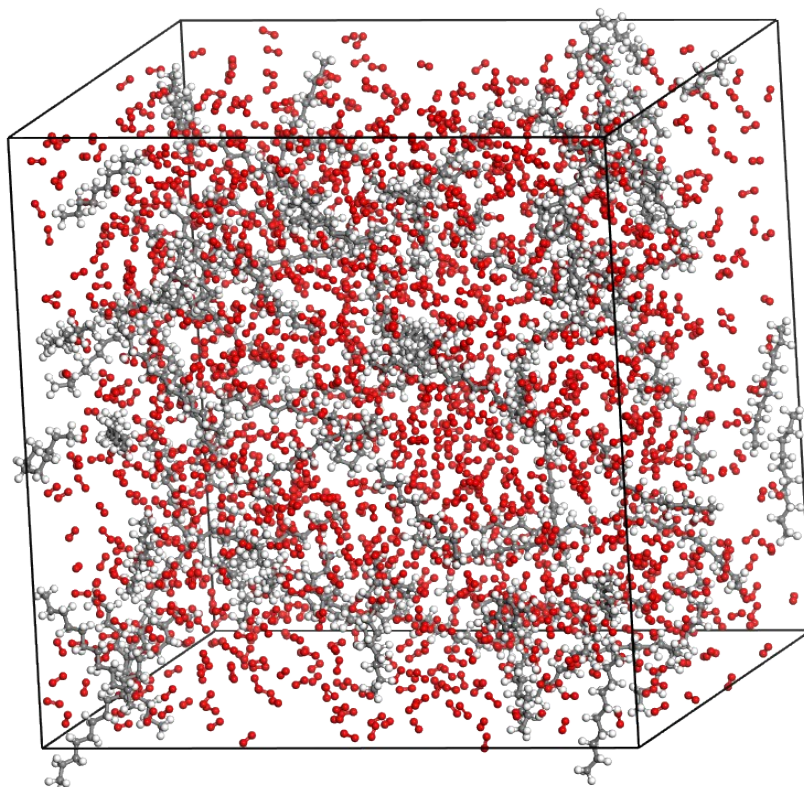

**Figure S2.** Starting configuration of RP-3 combustion system (6490 atoms). The gray balls represent C, white represent H, and red represent O, respectively.

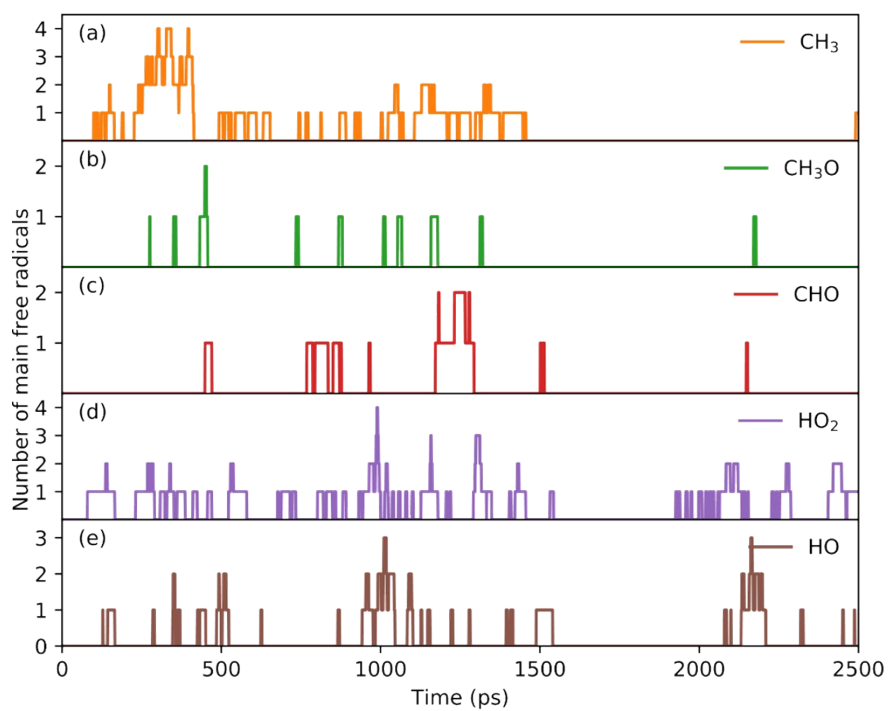

**Figure S3.** The number of important intermediates evolved with simulation time.

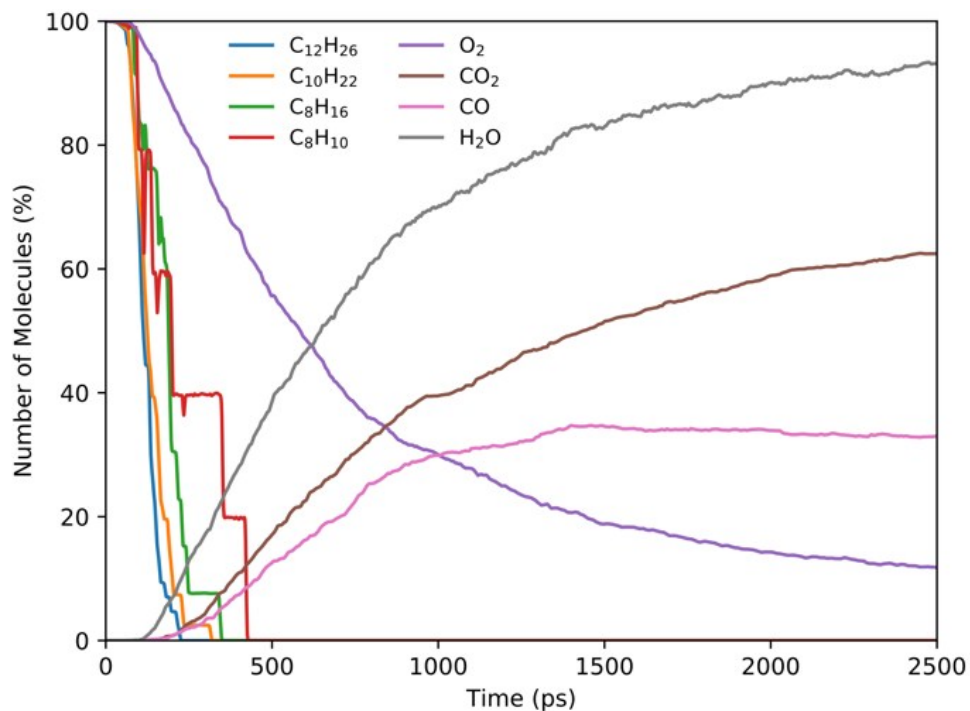

**Figure S4.** The distribution of reactants and products during the MD simulation.

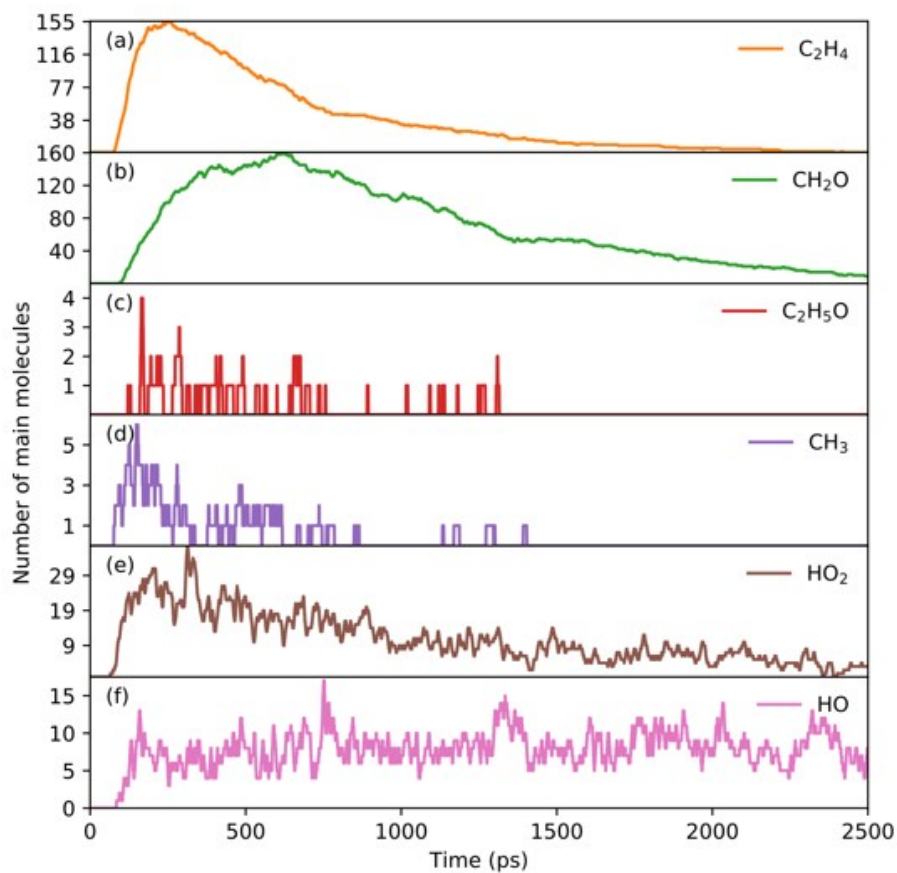

**Figure S5.** Distributions of important intermediates and radicals during the MD simulation.
